# Supplementary material for: A Polymorphism in the Epstein-Barr Virus EBER2 Noncoding RNA Drives In Vivo Expansion of Latently Infected B Cells
Source: PubMed Central journal article supplement (PMC9239156; doi:10.1128/mbio.00836-22), 2022-06-01
Supplement: mbio.00836-22-s0004.pdf [file mbio.00836-22-s0004.pdf]

**Supplementary Table 1. Location and frequency of EBER2 SNPs.**

| <b>Name</b> | <b>Minimum</b> | <b>Maximum</b> | <b>Change</b> | <b>Polymorphism Type</b> | <b>Variant Frequency</b> |
|-------------|----------------|----------------|---------------|--------------------------|--------------------------|
| G           | 44             | 44             | T -> G        | SNP (transversion)       | 31.70%                   |
| T           | 46             | 46             | A -> T        | SNP (transversion)       | 31.70%                   |
| G           | 57             | 57             | A -> G        | SNP (transition)         | 31.70%                   |
| T           | 61             | 61             | A -> T        | SNP (transversion)       | 31.70%                   |
| C           | 93             | 93             | A -> C        | SNP (transversion)       | 31.80%                   |
| G           | 168            | 168            | A -> G        | SNP (transition)         | 75.40%                   |
| G           | 170            | 169            | +G            | Insertion                | 14.60%                   |
